# Supplementary material for: Interconversion between ladder-type octanuclear and linear tetranuclear copper(i) complexes supported by tetraphosphine ligands
Source: Royal Society of Chemistry journal article supplement (doi:10.1039/b909252h), 2009-01-01

Electronic Supplementary Information (ESI)

for

**Interconversion between ladder-type octanuclear and linear tetranuclear copper(I) complexes supported by tetraphosphine ligands**

Yukie Takemura, Takayuki Nakajima, and Tomoaki Tanase\*

*Department of Chemistry, Faculty of Science, Nara Women's University, Kita-uoya-higashi-machi, Nara 630-8506, Japan*

E-mail: tanase@cc.nara-wu.ac.jp

**Fig. S1.** ORTEP for complex  $[\text{Cu}_8(\mu\text{-I})_2(\mu_3\text{-I})_6(\mu\text{-dpmppm})_2]$  (**1c**).

**Fig. S2**  $^{31}\text{P}\{^1\text{H}\}$  NMR spectra of **1a**, **1b** and **2** in  $\text{dms}\text{-}d_6$  and **7b** and **8c** in  $\text{dmf}\text{-}d_7$ .

**Fig. S3.** ORTEP for the complex cation of  $[\text{Cu}_4(\mu\text{-I})_3(\mu\text{-dpmppm})_2(\text{py})_2]\text{I}$  (**5**).

**Fig. S4.** ORTEP for the complex cation of  $[\text{Cu}_4(\mu\text{-I})_3(\mu\text{-dpmppm})_2(\text{MesNC})_2]\text{PF}_6$  (**8b**).

**Fig. S5.** ORTEP for the complex cation of  $[\text{Cu}_8(\mu\text{-I})_6(\mu\text{-dpmppm})_2(\text{'BuNC})_2](\text{PF}_6)_2$  (**9**).

**Fig. S1.** ORTEP for complex  $[\text{Cu}_8(\mu\text{-I})_2(\mu_3\text{-I})_6(\mu\text{-dpmppm})_2]$  (**1c**).

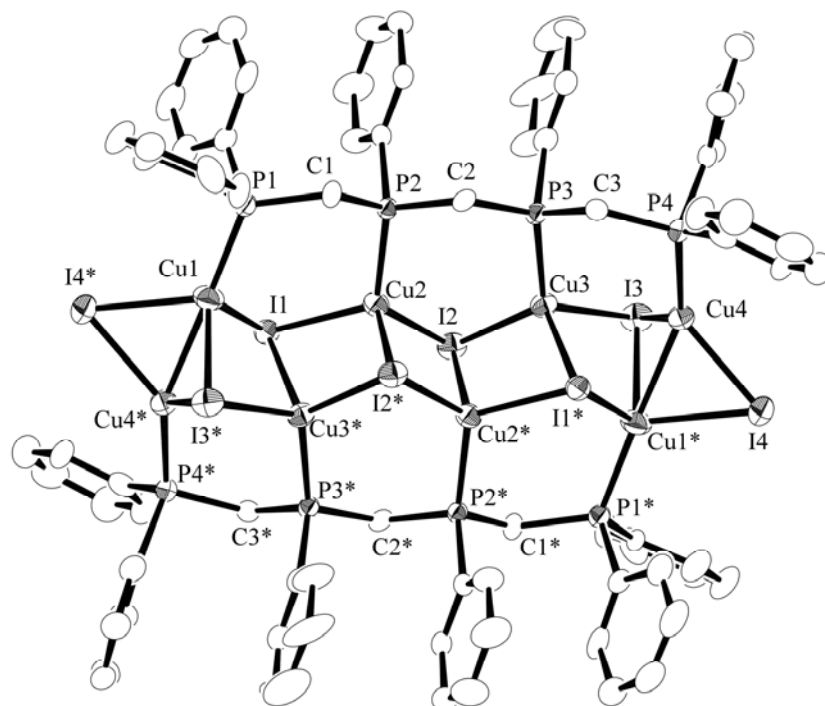

**Fig. S2**  $^{31}\text{P}\{^1\text{H}\}$  NMR spectra of (a) **1a**, (b) **1b** and (c) **2** in  $\text{dms}\text{-}d_6$  and (d) **7b** and (e) **8c** in  $\text{dmf-}d_7$  at room temperature.

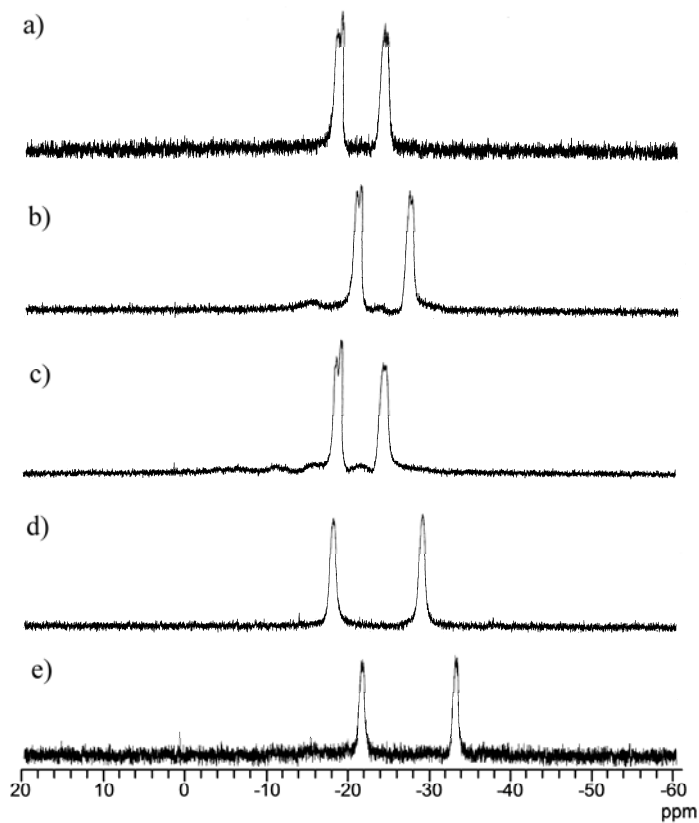

**Fig. S3.** ORTEP for the complex cation of  $[\text{Cu}_4(\mu\text{-I})_3(\mu\text{-dpmppm})_2(\text{py})_2]\text{I}$  (**5**).

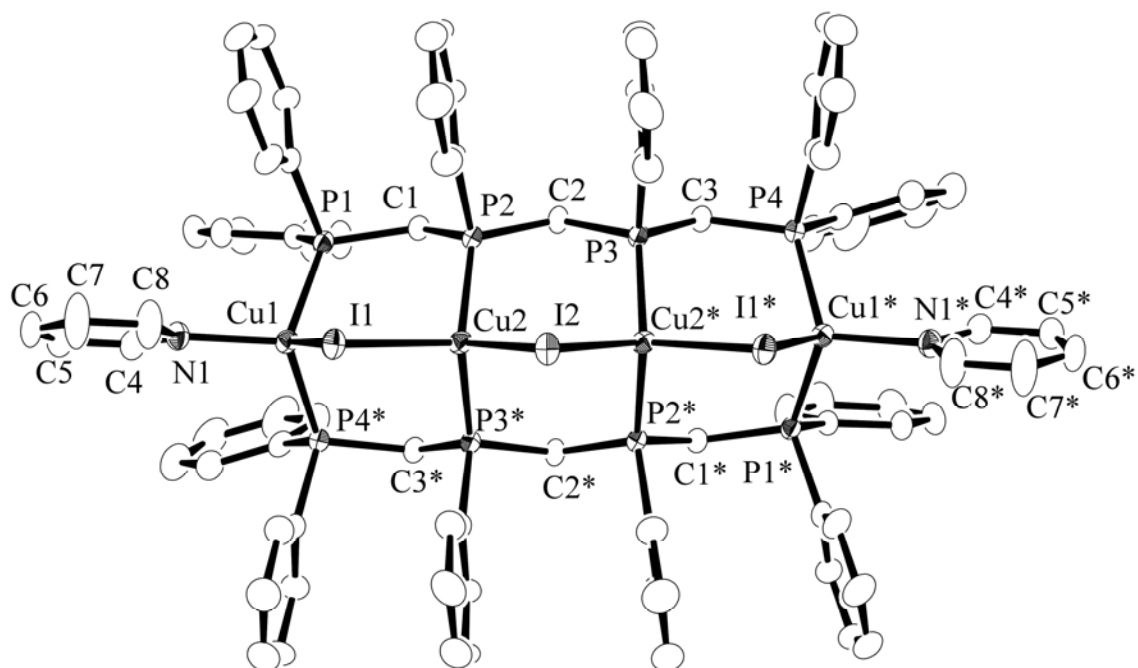

**Fig. S4.** ORTEP for the complex cation of  $[\text{Cu}_4(\mu\text{-I})_3(\mu\text{-dpmppm})_2(\text{MesNC})_2]\text{PF}_6$  (**8b**).

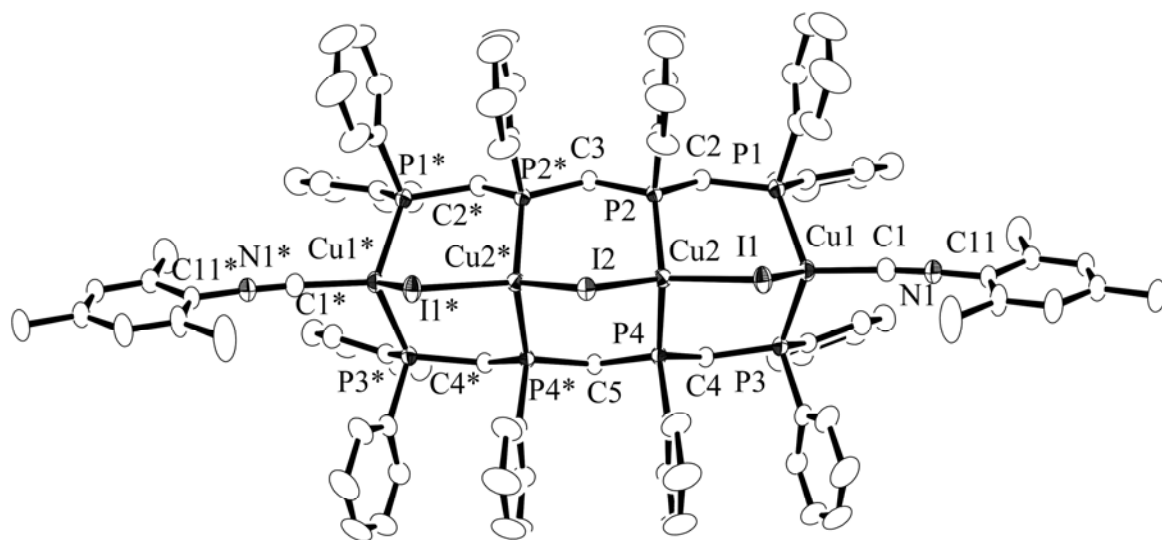

**Fig. S5.** ORTEP for the complex cation of  $[\text{Cu}_8(\mu\text{-I})_6(\mu\text{-dpmppm})_2(\text{BuNC})_2](\text{PF}_6)_2$  (**9**). The terminal isocyanide ligand is disordered in two sites (0.64 and 0.36 occupancies). The thermal ellipsoids of the Cu, I, and P atoms are drawn at the 40% probability level and the N and C atoms are drawn with arbitrary circles for clarity.

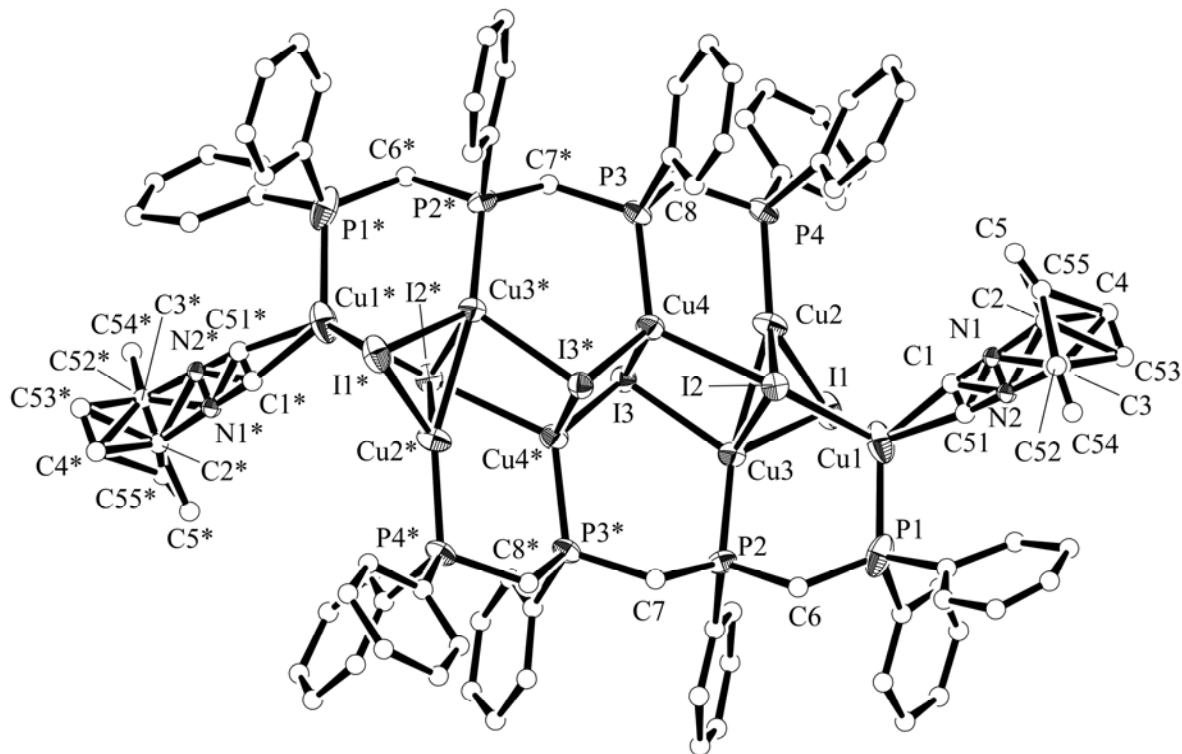

Supplement: b909252h.pdf [file b909252h.pdf]
